# Supplementary material
Source: PubMed Central journal article supplement (PMC8237108)
Supplement: NIHMS1702788-supplement-Supplemental_Table_1.pdf [file NIHMS1702788-supplement-Supplemental_Table_1.pdf]

**Supplementary Table 1: The yeast-two hybrid (Y2H) assay for 23 selected missense mutations across 13 oncoPPIs.**

| UniProt_ID_a | UniProt_ID_b | Gene_a | Gene_b  | Growth_score |
|--------------|--------------|--------|---------|--------------|
| Q15642       | Q15642       | TRIP10 | TRIP10  | 4            |
| Q15642-D23N  | Q15642       | TRIP10 | TRIP10  | 1            |
| Q15642-K51N  | Q15642       | TRIP10 | TRIP10  | 0            |
| Q15642-E88G  | Q15642       | TRIP10 | TRIP10  | 0            |
| Q15642-R121W | Q15642       | TRIP10 | TRIP10  | 4            |
| Q15642-H272Y | Q15642       | TRIP10 | TRIP10  | 4            |
| Q15642-G553R | Q15642       | TRIP10 | TRIP10  | 2            |
| Q13554       | Q13554       | CAMK2B | CAMK2B  | 3            |
| Q13554-R66C  | Q13554       | CAMK2B | CAMK2B  | 0            |
| Q13554-R75C  | Q13554       | CAMK2B | CAMK2B  | 1            |
| Q13554-I44V  | Q13554       | CAMK2B | CAMK2B  | 2            |
| Q13554-E237K | Q13554       | CAMK2B | CAMK2B  | 4            |
| Q6ZRY4       | Q6ZRY4       | RBPM2  | RBPM2   | 4            |
| Q6ZRY4-R92C  | Q6ZRY4       | RBPM2  | RBPM2   | 4            |
| Q6ZRY4-R92H  | Q6ZRY4       | RBPM2  | RBPM2   | 4            |
| Q99081       | O75575       | TCF12  | CRCP    | 2            |
| Q99081-R589H | O75575       | TCF13  | CRCP    | 0            |
| Q99081-R591W | O75575       | TCF14  | CRCP    | 0            |
| Q13163       | Q13164       | MAP2K5 | MAPK7   | 4            |
| Q13163-A28T  | Q13164       | MAP2K5 | MAPK7   | 4            |
| Q13163-R115W | Q13164       | MAP2K5 | MAPK7   | 3            |
| P61224       | Q12967       | RAP1B  | RALGDS  | 3            |
| P61224-T35M  | Q12967       | RAP1B  | RALGDS  | 0            |
| P61586       | P52565       | RHOA   | ARHGDI1 | 2            |
| P61586-P75S  | P52565       | RHOA   | ARHGDI1 | 0            |
| P09917       | Q9Y6D9       | ALOX5  | MAD1L1  | 3            |
| P09917-M146K | Q9Y6D9       | ALOX5  | MAD1L1  | 0            |
| O75558       | Q06455       | STX11  | RUNX1T1 | 3            |
| O75558-A200V | Q06455       | STX11  | RUNX1T1 | 0            |

|              |        |         |       |   |
|--------------|--------|---------|-------|---|
| Q9UH03       | Q9UH03 | SEPT3   | SEPT3 | 4 |
| Q9UH03-S184F | Q9UH03 | SEPT3   | SEPT3 | 2 |
| Q8IX15       | Q9UH73 | HOMEZ   | EBF1  | 2 |
| Q8IX15-R382W | Q9UH73 | HOMEZ   | EBF1  | 0 |
| P30153       | Q9Y534 | PPP2R1A | CSDC2 | 4 |
| P30153-W257L | Q9Y534 | PPP2R1A | CSDC2 | 3 |
| P54105       | P62308 | CLNS1A  | SNRPG | 4 |
| P54105-R70Q  | P62308 | CLNS1A  | SNRPG | 4 |

 WT or unperturbed

 Partially perturbed

 Perturbed
